# Supplementary material
Source: PubMed Central journal article supplement (PMC4421062)
Supplement: AEM.00010-15_zam999116287so1.pdf [file AEM.00010-15_zam999116287so1.pdf]

**Table S1**

Bacterial species isolated from wild *Agalychnis callidryas* and *Agalychnis moreletii* and tested for anti-*Batrachochytrium dendrobatidis* (*Bd*) activity against *Bd*GPL isolates SFBC 014 and AUL 1.2 using in vitro challenges. Bacterial isolates used for quantitative assessment of inhibitory activity against three *Bd*GPL isolates (CORN 3.2, JEL 423, VA05) are indicated by an #.

| <b>Bacterial species</b>          | <b>Host species</b>          | <b>GenBank accession number</b> | <b><i>Bd</i>GPL SFBC 014 inhibition</b> | <b><i>Bd</i>GPL AUL 1.2 inhibition</b> |
|-----------------------------------|------------------------------|---------------------------------|-----------------------------------------|----------------------------------------|
| <i>Acinetobacter sp. 1</i> (#)    | <i>Agalychnis moreletii</i>  | KC853177                        |                                         | Yes                                    |
| <i>Acinetobacter sp. 2</i> (#)    | <i>Agalychnis moreletii</i>  | KC853194                        | Yes                                     | Yes                                    |
| <i>Acinetobacter sp. 3</i>        | <i>Agalychnis moreletii</i>  | KC853193                        |                                         |                                        |
| <i>Acinetobacter sp. 4</i>        | <i>Agalychnis callidryas</i> | KC853216                        |                                         | Yes                                    |
| <i>Agrobacterium sp.</i> (#)      | <i>Agalychnis callidryas</i> | KC853210                        | Yes                                     | Yes                                    |
| <i>Arthrobacter sp.</i> (#)       | <i>Agalychnis callidryas</i> | KC853208                        |                                         |                                        |
| <i>Bacillus sp. 1</i>             | <i>Agalychnis callidryas</i> | KC853209                        |                                         |                                        |
| <i>Bacillus sp. 2</i>             | <i>Agalychnis callidryas</i> | KC853212                        |                                         |                                        |
| <i>Burkholderia sp.</i>           | <i>Agalychnis moreletii</i>  | KC853184                        |                                         |                                        |
| <i>Buttiauxella sp.</i>           | <i>Agalychnis moreletii</i>  | KC853180                        |                                         |                                        |
| <i>Chitinophaga sp.</i>           | <i>Agalychnis moreletii</i>  | KC853191                        |                                         |                                        |
| <i>Chryseobacterium sp. 1</i> (#) | <i>Agalychnis moreletii</i>  | KC853174                        |                                         |                                        |
| <i>Chryseobacterium sp. 2</i> (#) | <i>Agalychnis moreletii</i>  | KC853182                        | Yes                                     | Yes                                    |
| <i>Chryseobacterium sp. 3</i> (#) | <i>Agalychnis callidryas</i> | KC853202                        |                                         | Yes                                    |
| <i>Chryseobacterium sp. 4</i>     | <i>Agalychnis moreletii</i>  | KC853179                        |                                         |                                        |
| <i>Chryseobacterium sp. 5</i>     | <i>Agalychnis callidryas</i> | KC853218                        |                                         |                                        |
| <i>Citrobacter sp.</i>            | <i>Agalychnis</i>            | KC853213                        |                                         |                                        |

|                                      |                              |          |     |
|--------------------------------------|------------------------------|----------|-----|
|                                      | <i>callidryas</i>            |          |     |
| <b><i>Cupriavidus sp.</i></b>        | <i>Agalychnis callidryas</i> | KC853214 |     |
| <b><i>Curtobacterium sp. 1</i></b>   | <i>Agalychnis moreletii</i>  | KC853169 |     |
| <b><i>Curtobacterium sp. 2</i></b>   | <i>Agalychnis moreletii</i>  | KC853190 |     |
| <b><i>Deinococcus sp.</i></b>        | <i>Agalychnis callidryas</i> | KC853204 |     |
| <b><i>Enterobacter sp. 1 (#)</i></b> | <i>Agalychnis moreletii</i>  | KC853189 | Yes |
| <b><i>Enterobacter sp. 2 (#)</i></b> | <i>Agalychnis moreletii</i>  | KC853192 |     |
| <b><i>Enterobacter sp. 3</i></b>     | <i>Agalychnis callidryas</i> | KC853197 |     |
| <b><i>Enterobacter sp. 4</i></b>     | <i>Agalychnis callidryas</i> | KC853199 |     |
| <b><i>Enterobacter sp. 5</i></b>     | <i>Agalychnis callidryas</i> | KC853205 |     |
| <b><i>Enterobacter sp. 6</i></b>     | <i>Agalychnis callidryas</i> | KC853217 |     |
| <b><i>Enterobacter sp. 7</i></b>     | <i>Agalychnis callidryas</i> | KC853221 |     |
| <b><i>Enterobacter sp. 8</i></b>     | <i>Agalychnis callidryas</i> | KC853224 | Yes |
| <b><i>Erwinia sp.</i></b>            | <i>Agalychnis callidryas</i> | KC853200 |     |
| <b><i>Gordonia sp.</i></b>           | <i>Agalychnis callidryas</i> | KC853207 |     |
| <b><i>Kluyvera sp.</i></b>           | <i>Agalychnis moreletii</i>  | KC853172 |     |
| <b><i>Lysobacter sp. (#)</i></b>     | <i>Agalychnis moreletii</i>  | KC853178 | Yes |
| <b><i>Massilia sp.</i></b>           | <i>Agalychnis callidryas</i> | KC853215 |     |
| <b><i>Microbacterium sp.</i></b>     | <i>Agalychnis moreletii</i>  | KC853186 |     |
| <b><i>Novosphingobium sp. 1</i></b>  | <i>Agalychnis callidryas</i> | KC853211 |     |
| <b><i>Novosphingobium sp. 2</i></b>  | <i>Agalychnis callidryas</i> | KC853222 |     |
| <b><i>Pseudomonas sp.</i></b>        | <i>Agalychnis callidryas</i> | KC853219 |     |

|                                         |                              |          |     |
|-----------------------------------------|------------------------------|----------|-----|
| <b><i>Rhizobium sp.</i></b>             | <i>Agalychnis moreletii</i>  | KC853173 |     |
| <b><i>Sanguibacter sp. 1</i></b>        | <i>Agalychnis moreletii</i>  | KC853168 |     |
| <b><i>Sanguibacter sp. 2</i></b>        | <i>Agalychnis moreletii</i>  | KC853187 |     |
| <b><i>Sanguibacter sp. 3</i></b>        | <i>Agalychnis moreletii</i>  | KC853188 |     |
| <b><i>Serratia sp. 1 (#)</i></b>        | <i>Agalychnis moreletii</i>  | KC853175 | Yes |
| <b><i>Serratia sp. 2 (#)</i></b>        | <i>Agalychnis moreletii</i>  | KC853176 | Yes |
| <b><i>Serratia sp. 3 (#)</i></b>        | <i>Agalychnis moreletii</i>  | KC853181 |     |
| <b><i>Serratia sp. 4 (#)</i></b>        | <i>Agalychnis callidryas</i> | KC853196 | Yes |
| <b><i>Staphylococcus sp. 1</i></b>      | <i>Agalychnis moreletii</i>  | KC853170 |     |
| <b><i>Staphylococcus sp. 2</i></b>      | <i>Agalychnis callidryas</i> | KC853206 |     |
| <b><i>Staphylococcus sp. 3</i></b>      | <i>Agalychnis callidryas</i> | KC853223 |     |
| <b><i>Stentrophomonas sp. 1 (#)</i></b> | <i>Agalychnis callidryas</i> | KC853203 | Yes |
| <b><i>Stentrophomonas sp. 2</i></b>     | <i>Agalychnis moreletii</i>  | KC853183 |     |
| <b><i>Stentrophomonas sp. 3</i></b>     | <i>Agalychnis moreletii</i>  | KF444793 |     |
| <b><i>Stentrophomonas sp. 4</i></b>     | <i>Agalychnis callidryas</i> | KC853198 |     |
| <b><i>Stentrophomonas sp. 5</i></b>     | <i>Agalychnis callidryas</i> | KC853201 |     |
| <b><i>Stentrophomonas sp. 6</i></b>     | <i>Agalychnis callidryas</i> | KC853220 | Yes |
| <b><i>Stentrophomonas sp. 7</i></b>     | <i>Agalychnis moreletii</i>  | KC853171 | Yes |

**Table S2**

Parameter estimates from the best supported model investigating the effects of bacterial genus and *Bd* isolate on inhibition score. The best supported model contained both *Bd* isolate and bacterial genus as main effects. The intercept is the reference category of *Bd* isolate = CORN 3.2 and Bacterial Genus = *Acinetobacter*. Both the Bacterial Genus *Enterobacter* and the *Bd* isolate VA05 were associated with significantly lower inhibition scores (credible intervals for both effects do not cross zero). In addition, we provide the cut-point estimates to allow back-transformation of scoring probabilities for the four bacterial genera and three *Bd*GPL genotypes.

|                              | Posterior Mean | lower95% CI  | upper95% CI  |
|------------------------------|----------------|--------------|--------------|
| <b>Genus/Bacteria</b>        | 0.2100         | 0.0003       | 0.9800       |
|                              |                |              |              |
|                              | Posterior Mean | lower95% CI  | upper95% CI  |
| <b>(Intercept)</b>           | 0.37           | -0.69        | 1.32         |
| <b>BdJEL423</b>              | 0.33           | -0.56        | 1.12         |
| <b>BdVA05</b>                | <b>-1.42</b>   | <b>-2.46</b> | <b>-0.43</b> |
| <b>GenusChryseobacterium</b> | -0.16          | -1.42        | 0.98         |
| <b>GenusEnterobacter</b>     | <b>-2.03</b>   | <b>-3.53</b> | <b>-0.57</b> |
| <b>GenusSerratia</b>         | -0.36          | -1.44        | 0.61         |
|                              |                |              |              |
| Cutpoints:                   |                |              |              |
|                              | Posterior Mean | lower95% CI  | upper95% CI  |
| <b>cutpoint.traitinhib.1</b> | 0.27           | 0.09         | 0.50         |
| <b>cutpoint.traitinhib.2</b> | 0.76           | 0.45         | 1.13         |
| <b>cutpoint.traitinhib.3</b> | 1.46           | 1.02         | 1.95         |
| <b>cutpoint.traitinhib.4</b> | 1.93           | 1.33         | 2.45         |
| <b>cutpoint.traitinhib.5</b> | 2.23           | 1.57         | 2.88         |
| <b>cutpoint.traitinhib.6</b> | 2.63           | 1.79         | 3.43         |
| <b>cutpoint.traitinhib.7</b> | 2.98           | 1.98         | 3.87         |

**Table S3**

Model selection results from five ordinal models fitted using the package ‘MCMCglmm’ (Hadfield, 2010) to investigate the effects of bacterial genus and *Bd* isolate on inhibition score. All five competing models contained the same random effects structure controlling for phylogenetic structure of bacterial relatedness. (~Genus/Bacteria). The most complex model contained *Bd*GPL, Bacterial genus, and their interaction as fixed effects. We also fitted all 4 nested models: *Bd*GPL and Bacterial isolate as main effects without their interaction, *Bd* isolate only, Bacterial genus only, and an intercept only model. We compared all five models using the Deviance Information Criterion (DIC). All models were run for 100,000 iterations following a burnin of 20,000 iterations, with a thinning interval of 100. We used uninformative priors for the random effects (G) structure specifying  $V = 1$  and  $\nu = 0.002$ . As the residual variance is not identifiable for ordinal models, it was fixed at 1.

| <b>Model</b>          | <b>df</b> | <b>DIC</b> | <b><math>\Delta</math>DIC</b> |
|-----------------------|-----------|------------|-------------------------------|
| <b>Bd + Genus</b>     | 8         | 242.87     | 0                             |
| <b>Bd</b>             | 5         | 251.81     | 8.94                          |
| <b>Bd * genus</b>     | 14        | 257.72     | 14.85                         |
| <b>Intercept Only</b> | 3         | 262.61     | 19.74                         |
| <b>Genus</b>          | 6         | 265.93     | 23.05                         |

**All models contained Bacterial Isolate nested within Genus as random effects**

**Hadfield JD** (2010) MCMC Methods for Multi-Response Generalized Linear Mixed Models: The MCMCglmm R Package. *J Stats Softw* **33**: 1-22.
